# Supplementary material for: Novel cathode-supported hollow fibers for light weight micro-tubular solid oxide fuel cells with an active cathode functional layer
Source: Royal Society of Chemistry journal article supplement (doi:10.1039/c4ta04635h), 2014-11-19
Supplement: c4ta04635h1.pdf [file c4ta04635h1.pdf]

## Supporting information

### **Novel dual-layered cathode-supported hollow fibers for light weight micro-tubular solid oxide fuel cells with active cathode functional layer**

Xiuxia Meng<sup>a</sup>, Naitao Yang<sup>a,\*</sup>, Xun Gong<sup>a</sup>, Yimei Yin<sup>b</sup>, Zi-Feng Ma<sup>b\*</sup>, Xiaoyao Tan<sup>c</sup>,

Zongping Shao<sup>d</sup>, Shaomin Liu<sup>d\*</sup>

<sup>a</sup> School of Chemical Engineering, Shandong University of Technology, Zibo 255049, China

<sup>b</sup> Institute of Electrochemical and Energy Technology, Department of Chemical Engineering, Shanghai Jiao Tong University, Shanghai 200240, China

<sup>c</sup> Department of Chemical Engineering, Tianjin Polytechnic University, Tianjin300387, China

<sup>d</sup> Department of Chemical Engineering, Curtin University, Perth, WA 6845, Australia

\* Corresponding author

Email address: naitaoyang@126.com; zfma@sjtu.edu.cn; shaomin.Liu@curtin.edu.au

Tel: +86-533-2786292; +61-08-92669056; Fax: +86-533-2786292; +61-08-92662681

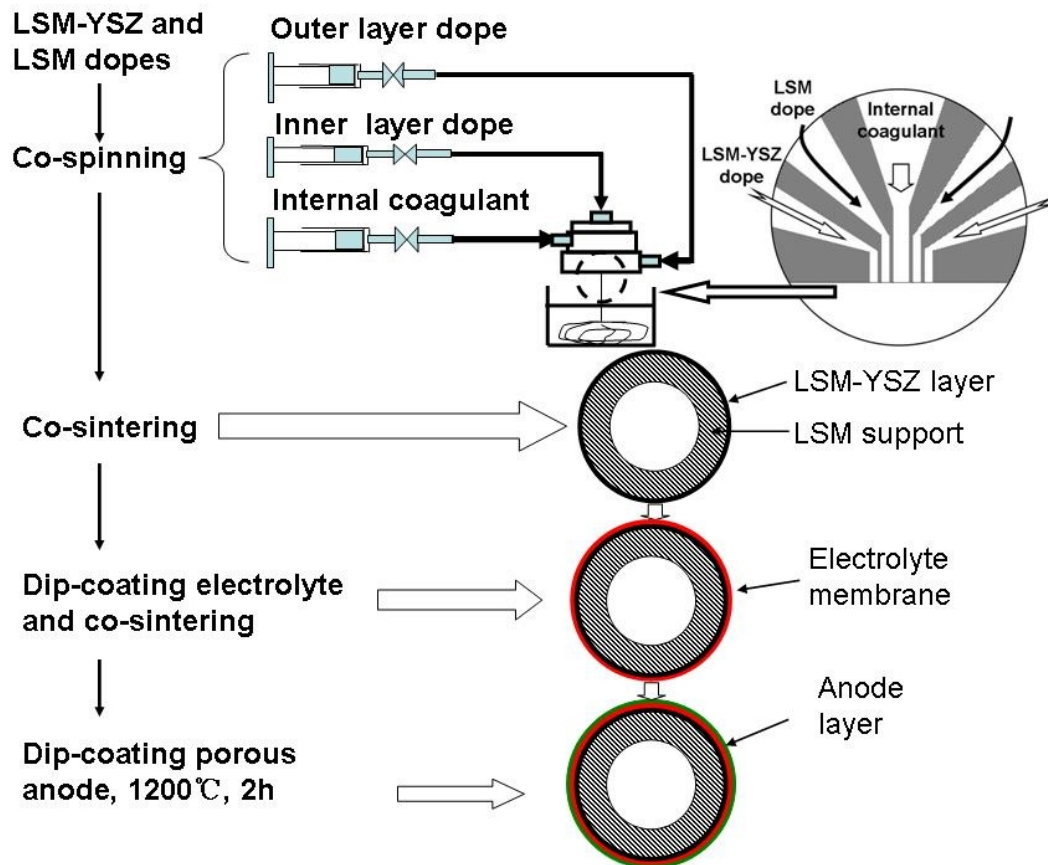

**Figure S1** A flowchart illustrating the processing procedures to prepare the dual-layer LSM-YSZ/LSM hollow fiber and the supported MT-SOFC.

**Table S1** Spinning parameters for dual-layer LSM-YSZ/LSM hollow fibers

| Layers                                     |               | LSM (inner) | LSM-YSZ (outer) |
|--------------------------------------------|---------------|-------------|-----------------|
|                                            | LSM           | 48.6        | 31.32           |
|                                            | YSZ           | 0           | 20.88           |
| Mass ratio (wt.%)                          | PESf          | 9.5         | 8.7             |
|                                            | NMP           | 33.3        | 39.1            |
|                                            | Ball graphite | 8.6         | 0               |
| Viscosity (mPa·s)                          |               | 45800       | 4100            |
| Spinning rate (mL min <sup>-1</sup> )      |               | 10          | 1               |
| Internal coagulant (mL min <sup>-1</sup> ) |               |             | 14              |
| Air-gap(cm)                                |               |             | 10              |
